# Supplementary material for: Decision aids for second-line palliative chemotherapy: a randomised phase II multicentre trial
Source: PubMed Central journal article supplement (PMC5580234; doi:10.1186/s12911-017-0529-y), 2017-08-31
Supplement: 12911_2017_529_MOESM4_ESM.pdf [file 12911_2017_529_MOESM4_ESM.pdf]

## Additional File 4 - Questionnaire for consultation decision aid

To be completed during the consultation in which the decision aid is offered

---

### Questions for the patient:

1. Which treatment do you prefer at this time?  
 treatment with chemotherapy  
 treatment without chemotherapy  
 don't know (please skip question 2 and proceed to offer the decision aid)
  
  2. How strong is the above preference?  

|                       |                       |                       |                       |
|-----------------------|-----------------------|-----------------------|-----------------------|
| <input type="radio"/> | <input type="radio"/> | <input type="radio"/> | <input type="radio"/> |
| not                   | rather                | strong                | very                  |
| strong                | strong                |                       | strong                |
- 

⇒ **Please offer the decision aid to the patient**

3. Did the patient want to receive the information about adverse events?  Yes  No
  4. Did the patient want to receive the information about tumour response?  Yes  No
  5. Did the patient want to receive the information about survival?  Yes  No
- 

### Questions for the patient:

6. Did you receive any information about adverse events from your doctor?  Yes  No
7. Did you receive any information about tumour response from your doctor?  Yes  No
8. Did you receive any information about survival from your doctor?  Yes  No
  
9. Which treatment do you prefer at this time?  
 treatment with chemotherapy  
 treatment without chemotherapy  
 don't know (please skip question 10)
  
10. How strong is the above preference?  

|                       |                       |                       |                       |
|-----------------------|-----------------------|-----------------------|-----------------------|
| <input type="radio"/> | <input type="radio"/> | <input type="radio"/> | <input type="radio"/> |
| not                   | rather                | strong                | very                  |
| strong                | strong                |                       | strong                |

**End of this consultation, please complete the questions on the next page after the consultation.**

**Questions for the nurse:**

11. Did the patient seem nervous, distressed, or emotional?       Yes       No

12. How did the interview go?

very difficult       difficult       neutral       well       very well

13. Was the patient alone or accompanied by a friend or relative?    alone       accompanied

14. Which chemotherapeutic regimen was discussed? .....
