# Supplementary material for: Decision aids for second-line palliative chemotherapy: a randomised phase II multicentre trial
Source: PubMed Central journal article supplement (PMC5580234; doi:10.1186/s12911-017-0529-y), 2017-08-31
Supplement: 12911_2017_529_MOESM5_ESM.pdf [file 12911_2017_529_MOESM5_ESM.pdf]

**4) Subjective knowledge**

The following 3 questions are about how you judge your knowledge about your current or previous cancer treatments. On a scale of 1-10, where

- |                          |                         |
|--------------------------|-------------------------|
| 1= extremely poor        | 6= sufficient           |
| 2= very poor             | 7= more than sufficient |
| 3= poor                  | 8= good                 |
| 4= strongly insufficient | 9= very good            |
| 5= insufficient          | 10= excellent           |

1. How would you judge your knowledge about the advantages of cancer treatments? .....
2. How would you judge your knowledge about the disadvantages of cancer treatments? .....
3. How would you judge your knowledge about cancer? .....

**6. Participation preference**

When the risks and benefits of the treatment options are known to you,

|                                                                    | Doctor alone | Mostly the doctor | Both equally | Mostly me | Me alone |
|--------------------------------------------------------------------|--------------|-------------------|--------------|-----------|----------|
| 1 Who decides how acceptable those risks and benefits are for you? | 1            | 2                 | 3            | 4         | 5        |
| 2 Who chooses between treatment options?                           | 1            | 2                 | 3            | 4         | 5        |

## 7. Information preference

Please circle the number that best indicates your view

I want to know nothing  
about the illness  
and its treatment

0 - 1 - 2 - 3 - 4 - 5 - 6 - 7 - 8 - 9 - 10

I want to know  
everything there is  
to know about the  
illness and its  
treatment

## 8. Amount of information

Please indicate what best indicates your view about how much information you have received about cancer and its treatment

|                                  |                           |                                       |                                       |                                     |                         |                                |
|----------------------------------|---------------------------|---------------------------------------|---------------------------------------|-------------------------------------|-------------------------|--------------------------------|
| <input type="radio"/>            | <input type="radio"/>     | <input type="radio"/>                 | <input type="radio"/>                 | <input type="radio"/>               | <input type="radio"/>   | <input type="radio"/>          |
| way too<br>little<br>information | too little<br>information | slightly too<br>little<br>information | the right<br>amount of<br>information | slightly too<br>much<br>information | too much<br>information | way too<br>much<br>information |

## 9. Hospital Anxiety and Depression Scale (HADS) [48]

## 10. Health-related quality of life: EORTC QLQ-C15-PAL [49]
