# Supplementary material for: Decision aids for second-line palliative chemotherapy: a randomised phase II multicentre trial
Source: Springer Nature journal article supplement (doi:10.1186/s12911-017-0529-y), 2017-08-31
Supplement: MOESM3 [file 14960360]

**CLINICIAN QUESTIONNAIRE (INCLUSION/PROGRESSION)**

**OVERVIEW OF QUESTIONS**

**SECTION A: TO BE COMPLETED AT INCLUSION**

---

**Patient characteristics**

Gender                       male  female

Name:                      .....

Address:                    .....

Postcode/City:            .....

Telephone number:      .....

Date of birth:             .....

Hospital number:        .....

---

Name of clinician        .....

Date:                      .... - .... - ....

Location:                .....

**Patient excluded (not asked for the study) because of:**

- Insufficient Dutch language proficiency
- Labile personality structure
- Karnofsky lower than 60
- Other reason .....

**If the patient agrees to be contacted about the study**

Please complete the questions on the next page after the consultation.

**If the patient does not want to be contacted about the study**

Did the patient volunteer a reason for not wanting to take part? Please document below:

.....  
.....

**Questions for the clinician, to be completed after the consultation:**

1. Do you think this patient will desire information about the risk of adverse events?  
 Yes  
 No
2. Do you think this patient will desire information about the chance of achieving a tumour response?  
 Yes  
 No
3. Do you think this patient will desire information about estimated survival?  
 Yes  
 No
4. Location primary tumour  
 Breast  
 Colon /rectum

---

**SECTION B: TO BE COMPLETED AT PROGRESSION**

---

5. Is this patient eligible for second-line palliative chemotherapy?  
 Yes  
 No --> there is no need to complete question 11  
Please explain why the patient is not eligible

.....

.....

.....
