# Supplementary material for: Decision aids for second-line palliative chemotherapy: a randomised phase II multicentre trial
Source: Springer Nature journal article supplement (doi:10.1186/s12911-017-0529-y), 2017-08-31
Supplement: MOESM7 [file 14960360]

## PATIENT QUESTIONNAIRE 3: 8 WEEK FOLLOW UP (T3)

### OVERVIEW OF QUESTIONS

---

#### 1) General health

How would you describe your general health during the past week?

worst  
imaginable  
health state

0 - 1 - 2 - 3 - 4 - 5 - 6 - 7 - 8 - 9 - 10

best  
imaginable  
health state

#### 2) Treatment received

Which treatment did you receive?

- best supportive care **with** chemotherapy
- best supportive care **without** chemotherapy
- don't know

#### 3) Treatment satisfaction

Please indicate your level of **satisfaction** with...

|   |                                               | Dissatisfied | Slightly<br>dissatisfied | Neutral | Slightly<br>satisfied | Satisfied | Very much<br>satisfied |
|---|-----------------------------------------------|--------------|--------------------------|---------|-----------------------|-----------|------------------------|
| 1 | The treatment<br>received                     | 1            | 2                        | 3       | 4                     | 5         | 6                      |
| 2 | The physical<br>consequences of<br>treatment  | 1            | 2                        | 3       | 4                     | 5         | 6                      |
| 3 | The emotional<br>consequences of<br>treatment | 1            | 2                        | 3       | 4                     | 5         | 6                      |

#### 4) Mental adjustment to cancer scale [51]

#### 5) Adapted Lerman's Cancer Worry Scale [50]

|                                                                            | Not at all | Sometimes | Often | Always |
|----------------------------------------------------------------------------|------------|-----------|-------|--------|
| 1 Have you thought about cancer in the past week?                          | 1          | 2         | 3     | 4      |
| 2 Have these thoughts affected your mood?                                  | 1          | 2         | 3     | 4      |
| 3 Have these thoughts interfered with your ability to do daily activities? | 1          | 2         | 3     | 4      |

#### 6) Satisfaction with quality of information

Please indicate your level of **satisfaction** with the **quality of information**...

|                                                            | Dissatisfied | Slightly dissatisfied | Neutral | Slightly satisfied | Satisfied | Very much satisfied |
|------------------------------------------------------------|--------------|-----------------------|---------|--------------------|-----------|---------------------|
| 1 About treatment-related adverse events                   | 1            | 2                     | 3       | 4                  | 5         | 6                   |
| 2 About any effects of treatment on the size of the tumour | 1            | 2                     | 3       | 4                  | 5         | 6                   |
| 3 About the effect of treatment on survival                | 1            | 2                     | 3       | 4                  | 5         | 6                   |

## 7) Amount of information

Please indicate what best indicates your view about how much information you have received about cancer treatment over the past few weeks

- way too little information       too little information       slightly too little information       the right amount of information       slightly too much information       too much information       way too much information

## 8) Perceived participation

|   |                                                                                              | Doctor alone | Mostly the doctor | Both equally | Mostly me | Me alone |
|---|----------------------------------------------------------------------------------------------|--------------|-------------------|--------------|-----------|----------|
| 1 | Who was involved in deciding if the risks and benefits of treatment were acceptable for you? | 1            | 2                 | 3            | 4         | 5        |
| 2 | Who was involved in choosing between treatment options?                                      | 1            | 2                 | 3            | 4         | 5        |

Do you feel you had a choice between the treatment options?

- Yes  
 No

Do you feel your opinion mattered when choosing between treatment options?

- Yes  
 No

## 9) Hospital Anxiety and Depression Scale (HADS) [48]

## 10) Decision Evaluation Scale [54]

**11) Treatment attitudes: valuations**

On a scale of 1-10, where

- |                          |                         |
|--------------------------|-------------------------|
| 1= extremely poor        | 6= sufficient           |
| 2= very poor             | 7= more than sufficient |
| 3= poor                  | 8= good                 |
| 4= strongly insufficient | 9= very good            |
| 5= insufficient          | 10= excellent           |

1. How would you value the treatment you received? .....

If you could choose again..

How appropriate do you feel treatment with **best supportive care alone** would be for you? ..... (0-10)

How appropriate do you feel treatment with **chemotherapy** would be for you? ..... (0-10)

**12) Health-related quality of life: EORTC QLQ-C15-PAL [49]**
